# Supplementary material for: Countering the Cognitive, Linguistic, and Psychological Underpinnings Behind Susceptibility to Fake News: A Review of Current Literature With Special Focus on the Role of Age and Digital Literacy
Source: Frontiers journal article supplement (doi:10.3389/fcomm.2021.661801), 2021-07-07
Supplement: Table_1.pdf [file Table_1.pdf]

## Appendix A

A meta-analysis showed that 74% of behavioral studies looking at fake news largely ignore age (N=62). The studies in this analysis were obtained from Google Scholar using Publish or Perish, a software program that retrieves and analyzes academic citations. The keywords used in the search query were “fake news” and “participants”. The word “participants” was chosen to ensure we ended up with behavioral studies. From the top 558 results, ranked by Google Scholar as being most relevant to our search query, we only selected the papers that had been referenced at least once. This resulted in 245 papers. The resulting papers were subjected to a manual relevance check by 2 separate individuals whose results were examined by 2 other individuals. The relevance check ensured that the articles were in fact behavioral fake news studies, and not loosely related articles that ended up in our search results. A final selection of 62 papers was made that were deemed relevant by all 4 individuals. If the results of an article were interpreted for different age ranges it was labelled as considering age, otherwise it was not. In Appendix A the 62 articles are presented. Some articles occur more than once, since they conducted multiple studies.

| Study                                                                                                                               | No. Participants | Age separated |
|-------------------------------------------------------------------------------------------------------------------------------------|------------------|---------------|
| Third person effects of fake news: Fake news regulation and media literacy interventions                                            | 1299             | No            |
| Lazy, not biased: Susceptibility to partisan fake news is better explained by lack of reasoning than by motivated reasoning         | 800              | No            |
| Selective exposure to misinformation: Evidence from the consumption of fake news during the 2016 US presidential campaign           | 2525             | Yes           |
| Prior exposure increases perceived accuracy of fake news.                                                                           | 949              | No            |
| Who falls for fake news? The roles of bullshit receptivity, overclaiming, familiarity, and analytic thinking                        | 1606             | No            |
| "News you don't believe": Audience perspectives on fake news                                                                        | 56               | No            |
| The fake news game: actively inoculating against the risk of misinformation                                                         | 96               | No            |
| 'Fake news': Incorrect, but hard to correct. The role of cognitive ability on the impact of false information on social impressions | 390              | No            |
| Belief in fake news is associated with delusionality, dogmatism, religious fundamentalism, and reduced analytic thinking            | 502              | No            |
| Belief in fake news is associated with delusionality, dogmatism, religious fundamentalism, and reduced analytic thinking            | 446              | No            |
| Priming and fake news: The effects of elite discourse on evaluations of news media                                                  | 299              | No            |
| Fake news game confers psychological resistance against online misinformation                                                       | 14266            | Yes           |
| Priming critical thinking: Simple interventions limit the influence of fake news about climate change on Facebook                   | 2750             | No            |
| Scottish citizens' perceptions of the credibility of online political “facts” in the “fake news” era                                | 23               | Yes           |
| Critical thinking efficacy and transfer skills defend against 'fake news' at an international school in Finland                     | 67               | Yes           |

|                                                                                                                                            |       |     |
|--------------------------------------------------------------------------------------------------------------------------------------------|-------|-----|
| Factitious: Large Scale Computer Game to Fight Fake News and Improve News Literacy                                                         | 45000 | Yes |
| The Implied Truth Effect: Attaching Warnings to a Subset of Fake News Headlines Increases Perceived Accuracy of Headlines Without Warnings | 5271  | No  |
| The Implied Truth Effect: Attaching Warnings to a Subset of Fake News Headlines Increases Perceived Accuracy of Headlines Without Warnings | 1568  | No  |
| The future of free speech, trolls, anonymity and fake news online                                                                          | 1537  | No  |
| Priming and fake news: The effects of elite discourse on evaluations of news media                                                         | 299   | Yes |
| Spreading Disinformation on Facebook: Do Trust in Message Source, Risk Propensity, or Personality Affect the Organic Reach of “Fake News”? | 357   | No  |
| The Reception of Fake News: The Interpretations and Practices That Shape the Consumption of Perceived Misinformation                       | 71    | No  |
| Too good to be true, too good not to share: the social utility of fake news                                                                | 88    | Yes |
| Fake news reading on social media: an eye-tracking study                                                                                   | 44    | No  |
| Appealing to Sense and Sensibility: System 1 and System 2 Interventions for Fake News on Social Media                                      | 397   | Yes |
| Do you really know if it's true? How asking users to rate stories affects belief in fake news on social media                              | 68    | No  |
| Socioscientific perspectives on 'fake news' in the ERA of social media among generation Z Filipinos                                        | 38    | No  |
| Breaking the news: the effects of fake news on political attitudes                                                                         | 256   | No  |
| Fake news? Examining the connection between value-based environmental messages, environmental concern, and pro-environmental intention     | 83    | No  |
| Why do people share fake news? Associations between the dark side of social media use and fake news sharing behavior                       | 1022  | No  |
| The “Fake News” Effect: An Experiment on Motivated Reasoning and Trust in News                                                             | 987   | No  |
| Refuting fake news on social media: nonprofits, crisis response strategies and issue involvement                                           | 468   | No  |
| TrustyTweet: An Indicator-based Browser-Plugin to Assist Users in Dealing with Fake News on Twitter                                        | 27    | No  |
| “You are Fake News”: Ideological (A) symmetries in Perceptions of Media Legitimacy                                                         | 722   | No  |
| “You are Fake News”: Ideological (A) symmetries in Perceptions of Media Legitimacy                                                         | 570   | No  |
| “You are Fake News”: Ideological (A) symmetries in Perceptions of Media Legitimacy                                                         | 983   | No  |
| Reliance on emotion promotes belief in fake news                                                                                           | 409   | No  |
| Reliance on emotion promotes belief in fake news                                                                                           | 3884  | No  |
| Diffusion of disinformation: How social media users respond to fake news and why                                                           | 2501  | No  |
| Diffusion of disinformation: How social media users respond to fake news and why                                                           | 20    | No  |

|                                                                                                                                                                 |       |     |
|-----------------------------------------------------------------------------------------------------------------------------------------------------------------|-------|-----|
| Fake news and social media: How Greek users identify and curb misinformation online                                                                             | 100   | Yes |
| Educators' perceptions of information literacy and skills required to spot 'fake news'                                                                          | 18    | No  |
| Satire or fake news: Social media consumers' socio-demographics decide                                                                                          | 382   | Yes |
| Identity concerns drive belief in fake news                                                                                                                     | 480   | No  |
| Identity concerns drive belief in fake news                                                                                                                     | 405   | No  |
| Identity concerns drive belief in fake news                                                                                                                     | 551   | No  |
| Fake news, fast and slow: Deliberation reduces belief in false (but not true) news headlines                                                                    | 1635  | No  |
| To Verify or to Disengage: Coping with “Fake News” and Ambiguity                                                                                                | 58    | Yes |
| Understanding the Tendency of Media Users to Consume Fake News                                                                                                  | 400   | Yes |
| Combating Fake News on Social Media with Source Ratings: The Effects of User and Expert Reputation Ratings                                                      | 590   | Yes |
| Combating Fake News on Social Media with Source Ratings: The Effects of User and Expert Reputation Ratings                                                      | 299   | Yes |
| Fake News on Social Media: People Believe What They Want to Believe When it Makes No Sense at All                                                               | 83    | No  |
| Fake News Perception in Germany: A Representative Study of People's Attitudes and Approaches to Counteract Disinformation                                       | 1023  | Yes |
| Fake News on Social Media: The (In) Effectiveness of Warning Messages                                                                                           | 151   | No  |
| Fake news: Australian and British journalists' role perceptions in an era of “alternative facts”                                                                | 11    | No  |
| “This is fake news”: Investigating the role of conformity to other users' views when commenting on and spreading disinformation in social media                 | 1201  | No  |
| “This is fake news”: Investigating the role of conformity to other users' views when commenting on and spreading disinformation in social media                 | 800   | No  |
| Truth and Trust: How audiences are making sense of Fake News                                                                                                    | 12    | No  |
| Fake News, Real Problems for Brands: The Impact of Content Truthfulness and Source Credibility on consumers' Behavioral Intentions toward the Advertised Brands | 400   | No  |
| Fake news game confers psychological resistance against online misinformation                                                                                   | 15000 | Yes |
| Fake news judgement                                                                                                                                             | 16    | No  |
| Human values and trust in scientific journals, the mainstream media and fake news                                                                               | 69    | No  |
